# Supplementary material
Source: bioRxiv or medRxiv preprint supplement (https://medrxiv.org/highwire/filestream/86443/field_highwire_adjunct_files/0/2020.06.16.20133207-1.pdf)
Supplement: Supplementary file [file 2020.06.16.20133207-1.pdf]

## **Appendix 1.** List of excluded face masks

- Oxygen face masks
- OxyMask
- Goldman nasal masks
- Patil-Syracuse Mask
- Ventilation masks
- non-invasive ventilation masks
- Venti-Mask
- Venturi mask
- Mechanical ventilation masks
- Facemask anaesthesia (Anaesthesia induction using face masks)
- Sports protective masks (Hockey masks)
- Diving masks, Scuba masks
- Thermoplastic masks (protective masks for irradiation fields and radiotherapy)
- Bag-valve-mask
- Laryngeal mask
- Oronasal masks
- Sleep masks
- N95 masks with valves (as it does not reduce the spread of virus transmission)
